# Supplementary material for: Diverse architectures and luminescence properties of two novel copper(i) coordination polymers assembled from 2,6-bis[3-(pyrid-4-yl)-1,2,4-triazolyl]pyridine ligands
Source: Royal Society of Chemistry journal article supplement (doi:10.1039/c4ce02351j), 2015-01-01
Supplement: c4ce02351j1.pdf [file c4ce02351j1.pdf]

## Supporting Information

### **Diverse Architectures and Luminescent Properties of Two Novel Copper(I) Coordination Polymers Assembled from 2,6-Bis[3-(pyrid-4-yl)-1,2,4-triazolyl]pyridine Ligands**

Jie Pan,<sup>ab</sup> Cai-Ping Liu,<sup>a</sup> Fei-Long Jiang,<sup>a</sup> Ming-Yan Wu,<sup>a</sup> Lian Chen,<sup>a</sup> Jin-Jie Qian,<sup>ab</sup> Kong-Zhao Su,<sup>ab</sup> Xiu-Yan Wan,<sup>ab</sup> and Mao-Chun Hong<sup>\*a</sup>

<sup>a</sup>Key Laboratory of Optoelectronic Materials Chemistry and Physics, Fujian Institute of Research on the Structure of Matter, Chinese Academy of Sciences, Fuzhou, 350002, China

<sup>b</sup>University of the Chinese Academy of Sciences, Beijing, 100049, China

To whom correspondence should be addressed. Tel: +86-591-83792460. Fax: +86-

591-83794946. E-mail: [hmc@fjirsm.ac.cn](mailto:hmc@fjirsm.ac.cn)

1. PXRD patterns of complexes **1** and **2**.

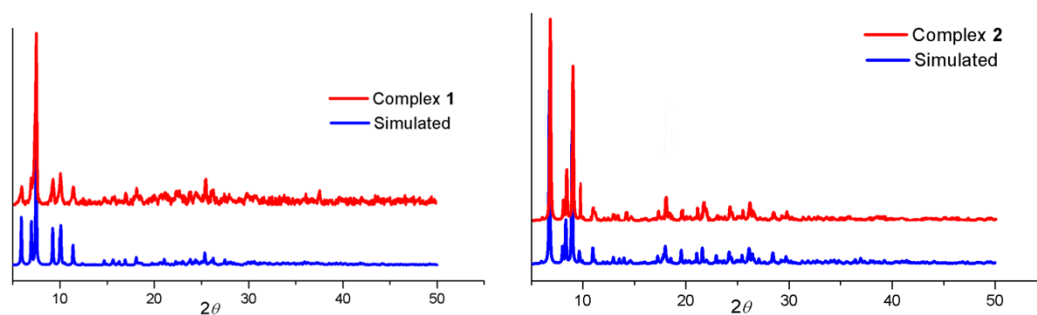

**Figure S1.** PXRD experimental and calculated patterns for complexes.

2. TGA curves for complexes **1** and **2**.

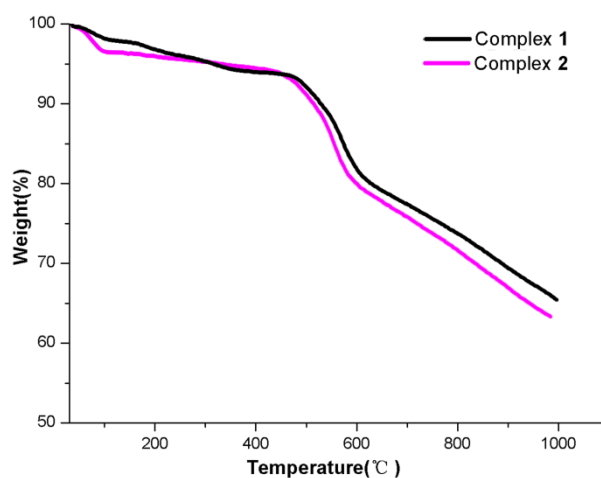

**Figure S2.** TGA curves for complexes **1** and **2**.

3. Diffuse reflectance spectra of the complexes **1** and **2** in the solid state.

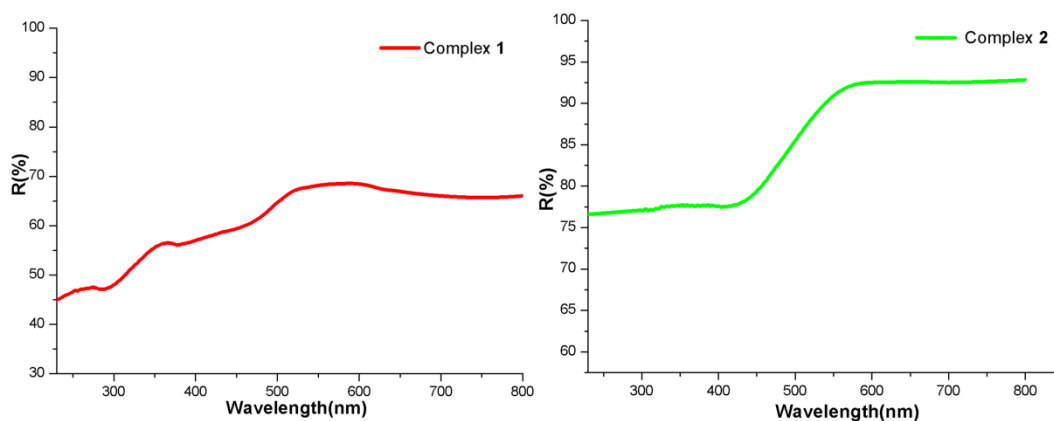

**Figure S3.** Diffuse reflectance spectra of the complexes **1** and **2** in the solid state.

4. CIE-1931 chromaticity diagram for H<sub>2</sub>btp, **1** and **2**.

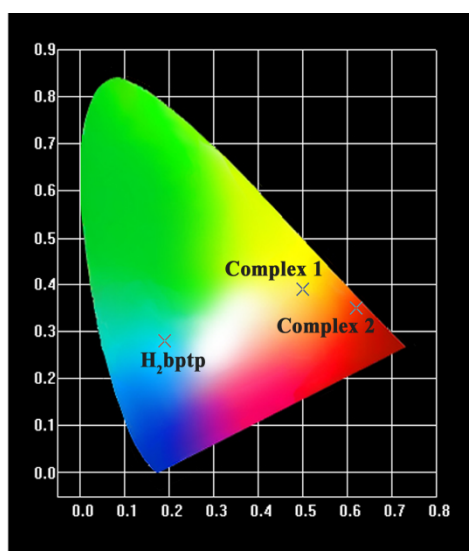

**Figure S4.** CIE-1931 chromaticity diagram showing the blue, yellow and orange-red luminescence at 298 K for H<sub>2</sub>btp, **1** and **2**, respectively. CIE coordinates are calculated using the software GoCIE, obtained from <http://www.geocities.com/krjustin/gocie.html>, accessed in 2010.

5. Solid-state emission spectra of the H<sub>2</sub>btp at 298 K.

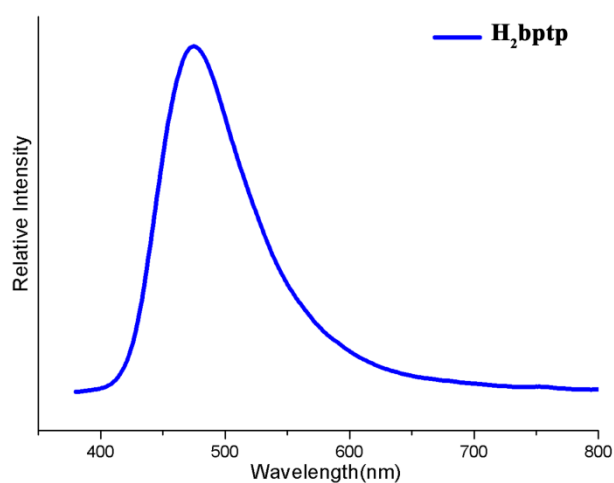

**Figure S5.** Solid state emission spectra of free H<sub>2</sub>btp ligand.

6. Selected bond lengths (Å) and angles (°) for complexes **1** and **2**.

Table S1. Selected Bond Lengths (Å) and Angles (°) for Complexes.

| Complex 1 |             |         |             |
|-----------|-------------|---------|-------------|
| Cu1—N21   | 1.881 (3)   | Cu4—Cu5 | 2.9932 (9)  |
| Cu1—N4    | 1.905 (3)   | Cu5—N8  | 1.880 (3)   |
| Cu1—N5    | 2.374 (3)   | Cu5—N25 | 1.890 (3)   |
| Cu2—N31   | 1.880 (3)   | Cu6—N16 | 1.868 (3)   |
| Cu2—N12   | 1.888 (3)   | Cu6—N35 | 1.878 (3)   |
| Cu2—Cu1   | 2.9047 (10) | Cu6—Cu5 | 2.9259 (11) |
| Cu2—Cu4   | 3.0386 (9)  | Cu6—Cu3 | 2.9261 (9)  |
| Cu3—N7    | 1.886 (3)   | Cu7—N17 | 1.966 (3)   |

|             |             |                           |             |
|-------------|-------------|---------------------------|-------------|
| Cu3—N13     | 1.888 (3)   | Cu7—N26                   | 2.007 (3)   |
| Cu3—N14     | 2.455 (3)   | Cu7—N1 <sup>i</sup>       | 2.051 (3)   |
| Cu3—Cu4     | 2.5466 (9)  | Cu8—N30                   | 1.941 (3)   |
| Cu3—Cu1     | 3.0240 (10) | Cu8—N3                    | 1.959 (3)   |
| Cu4—N34     | 1.887 (3)   | Cu8—N28 <sup>ii</sup>     | 2.036 (3)   |
| Cu4—N22     | 1.890 (3)   |                           |             |
| N21—Cu1—N4  | 155.98 (14) | Cu6—Cu3—Cu1               | 157.94 (2)  |
| N21—Cu1—N5  | 126.58 (12) | N34—Cu4—N22               | 167.05 (13) |
| N4—Cu1—N5   | 76.34 (12)  | N34—Cu4—Cu3               | 94.37 (10)  |
| N21—Cu1—Cu2 | 92.50 (10)  | N22—Cu4—Cu3               | 96.87 (10)  |
| N4—Cu1—Cu2  | 79.58 (10)  | N34—Cu4—Cu5               | 88.59 (9)   |
| N5—Cu1—Cu2  | 119.18 (8)  | N22—Cu4—Cu5               | 87.48 (9)   |
| N21—Cu1—Cu3 | 92.16 (9)   | Cu3—Cu4—Cu5               | 78.03 (3)   |
| N4—Cu1—Cu3  | 106.97 (10) | N34—Cu4—Cu2               | 100.90 (9)  |
| N5—Cu1—Cu3  | 62.02 (8)   | N22—Cu4—Cu2               | 87.67 (9)   |
| Cu2—Cu1—Cu3 | 73.55 (3)   | Cu3—Cu4—Cu2               | 78.41 (2)   |
| N31—Cu2—N12 | 172.64 (13) | Cu5—Cu4—Cu2               | 155.18 (2)  |
| N31—Cu2—Cu1 | 89.82 (11)  | N8—Cu5—N25                | 163.63 (14) |
| N12—Cu2—Cu1 | 89.24 (10)  | N8—Cu5—Cu6                | 93.30 (10)  |
| N31—Cu2—Cu4 | 91.82 (10)  | N25—Cu5—Cu6               | 80.35 (10)  |
| N12—Cu2—Cu4 | 94.91 (9)   | N8—Cu5—Cu4                | 91.12 (9)   |
| Cu1—Cu2—Cu4 | 73.34 (2)   | N25—Cu5—Cu4               | 101.39 (9)  |
| N7—Cu3—N13  | 160.21 (13) | Cu6—Cu5—Cu4               | 73.62 (2)   |
| N7—Cu3—N14  | 100.84 (13) | N16—Cu6—N35               | 172.95 (13) |
| N13—Cu3—N14 | 76.81 (12)  | N16—Cu6—Cu5               | 87.86 (11)  |
| N7—Cu3—Cu4  | 94.86 (10)  | N35—Cu6—Cu5               | 92.71 (10)  |
| N13—Cu3—Cu4 | 98.54 (10)  | N16—Cu6—Cu3               | 95.32 (10)  |
| N14—Cu3—Cu4 | 142.96 (8)  | N35—Cu6—Cu3               | 91.57 (9)   |
| N7—Cu3—Cu6  | 91.56 (10)  | Cu5—Cu6—Cu3               | 73.58 (3)   |
| N13—Cu3—Cu6 | 104.94 (10) | N17—Cu7—N26               | 122.91 (12) |
| N14—Cu3—Cu6 | 65.88 (7)   | N17—Cu7—N1 <sup>i</sup>   | 121.23 (13) |
| Cu4—Cu3—Cu6 | 80.47 (2)   | N26—Cu7—N1 <sup>i</sup>   | 115.67 (12) |
| N7—Cu3—Cu1  | 83.07 (10)  | N30—Cu8—N3                | 126.65 (13) |
| N13—Cu3—Cu1 | 85.35 (9)   | N30—Cu8—N28 <sup>ii</sup> | 120.89 (14) |
| N14—Cu3—Cu1 | 136.13 (7)  | N3—Cu8—N28 <sup>ii</sup>  | 110.80 (14) |
| Cu4—Cu3—Cu1 | 78.70 (3)   |                           |             |

Symmetry codes: (i) x, 1+y, z; (ii) 2-x, -y, 1-z; (iii) x, -1+y, z.

| Complex 2              |           |                      |           |
|------------------------|-----------|----------------------|-----------|
| Cu1—N15 <sup>iii</sup> | 1.932 (6) | Cu3—N7               | 2.089 (6) |
| Cu1—N2                 | 1.950 (6) | Cu4—N4 <sup>i</sup>  | 1.944 (6) |
| Cu1—N5                 | 2.315 (7) | Cu4—N12              | 1.967 (7) |
| Cu2—N6                 | 1.892 (8) | Cu4—N9 <sup>ii</sup> | 2.038 (7) |

|                             |            |                                         |           |
|-----------------------------|------------|-----------------------------------------|-----------|
| Cu2—N13 <sup>iii</sup>      | 1.903 (7)  | Cu5—C39 <sup>iv</sup>                   | 1.868 (8) |
| Cu2—Cu1                     | 2.701 (2)  | Cu5—N10 <sup>v</sup>                    | 2.015 (8) |
| Cu3—N19                     | 1.870 (8)  | Cu5—N18                                 | 2.084 (8) |
| Cu3—N17                     | 1.973 (7)  |                                         |           |
| N15 <sup>iii</sup> —Cu1—N2  | 146.0 (3)  | N19—Cu3—N17                             | 145.2 (3) |
| N15 <sup>iii</sup> —Cu1—N5  | 125.8 (3)  | N19—Cu3—N7                              | 114.7 (3) |
| N2—Cu1—N5                   | 78.5 (2)   | N17—Cu3—N7                              | 100.0 (3) |
| N15 <sup>iii</sup> —Cu1—Cu2 | 99.6 (2)   | N4 <sup>i</sup> —Cu4—N12                | 136.9 (3) |
| N2—Cu1—Cu2                  | 111.4 (2)  | N4 <sup>i</sup> —Cu4—N9 <sup>ii</sup>   | 115.8 (3) |
| N5—Cu1—Cu2                  | 72.24 (17) | N12—Cu4—N9 <sup>ii</sup>                | 106.0 (3) |
| N6—Cu2—N13 <sup>iii</sup>   | 167.4 (3)  | C39 <sup>iv</sup> —Cu5—N10 <sup>v</sup> | 138.1 (3) |
| N6—Cu2—Cu1                  | 87.5 (2)   | C39 <sup>iv</sup> —Cu5—N18              | 120.3 (3) |
| N13 <sup>iii</sup> —Cu2—Cu1 | 99.8 (2)   | N10 <sup>v</sup> —Cu5—N18               | 100.5 (3) |

Symmetry codes: (i) -1+x, y, 1+z; (ii) -1+x, y, z; (iii) -x, 1-y, 1-z; (iv) -x, 2-y, 1-z; (v) -1-x, 1-y, 2-z.

## 7. Photoluminescent data of complexes **1** and **2**.

Table S2. Photoluminescent data of complexes **1** and **2**.

| Complex 1 |                                 |                                 |                                              |
|-----------|---------------------------------|---------------------------------|----------------------------------------------|
| T/K       | $\lambda_{\text{ex}}/\text{nm}$ | $\lambda_{\text{em}}/\text{nm}$ | $\tau/\text{s}$                              |
| 298       | 380                             | 623                             | $6.975 \times e^{-8}$ (51.53% <sup>a</sup> ) |
|           |                                 |                                 | $4.189 \times e^{-7}$ (48.47% <sup>a</sup> ) |
| 10        | 380                             | 623                             | $1.078 \times e^{-5}$ (80.14% <sup>a</sup> ) |
|           |                                 |                                 | $1.172 \times e^{-6}$ (19.86% <sup>a</sup> ) |
| Complex 2 |                                 |                                 |                                              |
| 298       | 380                             | 673                             | $1.084 \times e^{-6}$                        |
| 10        | 380                             | 650                             | $1.325 \times e^{-5}$ (88.98% <sup>a</sup> ) |
|           |                                 |                                 | $3.110 \times e^{-6}$ (11.02% <sup>a</sup> ) |

<sup>a</sup> Biexponential decay.
